# Supplementary material for: A scaffold lncRNA shapes the mitosis to meiosis switch
Source: PubMed Central journal article supplement (PMC7859202; doi:10.1038/s41467-021-21032-7), 2021-02-03
Supplement: 41467_2021_21032_MOESM1_ESM.pdf [file 41467_2021_21032_MOESM1_ESM.pdf]

# **Supplementary Information**

## **A scaffold lncRNA shapes the mitosis to meiosis switch**

Vedrana Andric<sup>1,6</sup>, Alicia Nevers<sup>1,4,6</sup>, Ditipriya Hazra<sup>2,5,6</sup>, Sylvie Auxilien<sup>1</sup>, Alexandra Menant<sup>1</sup>, Marc Graille<sup>2</sup>, Benoit Palancade<sup>3</sup>, Mathieu Rougemaille<sup>1,\*</sup>

Correspondence to: [mathieu.rougemaille@i2bc.paris-saclay.fr](mailto:mathieu.rougemaille@i2bc.paris-saclay.fr)

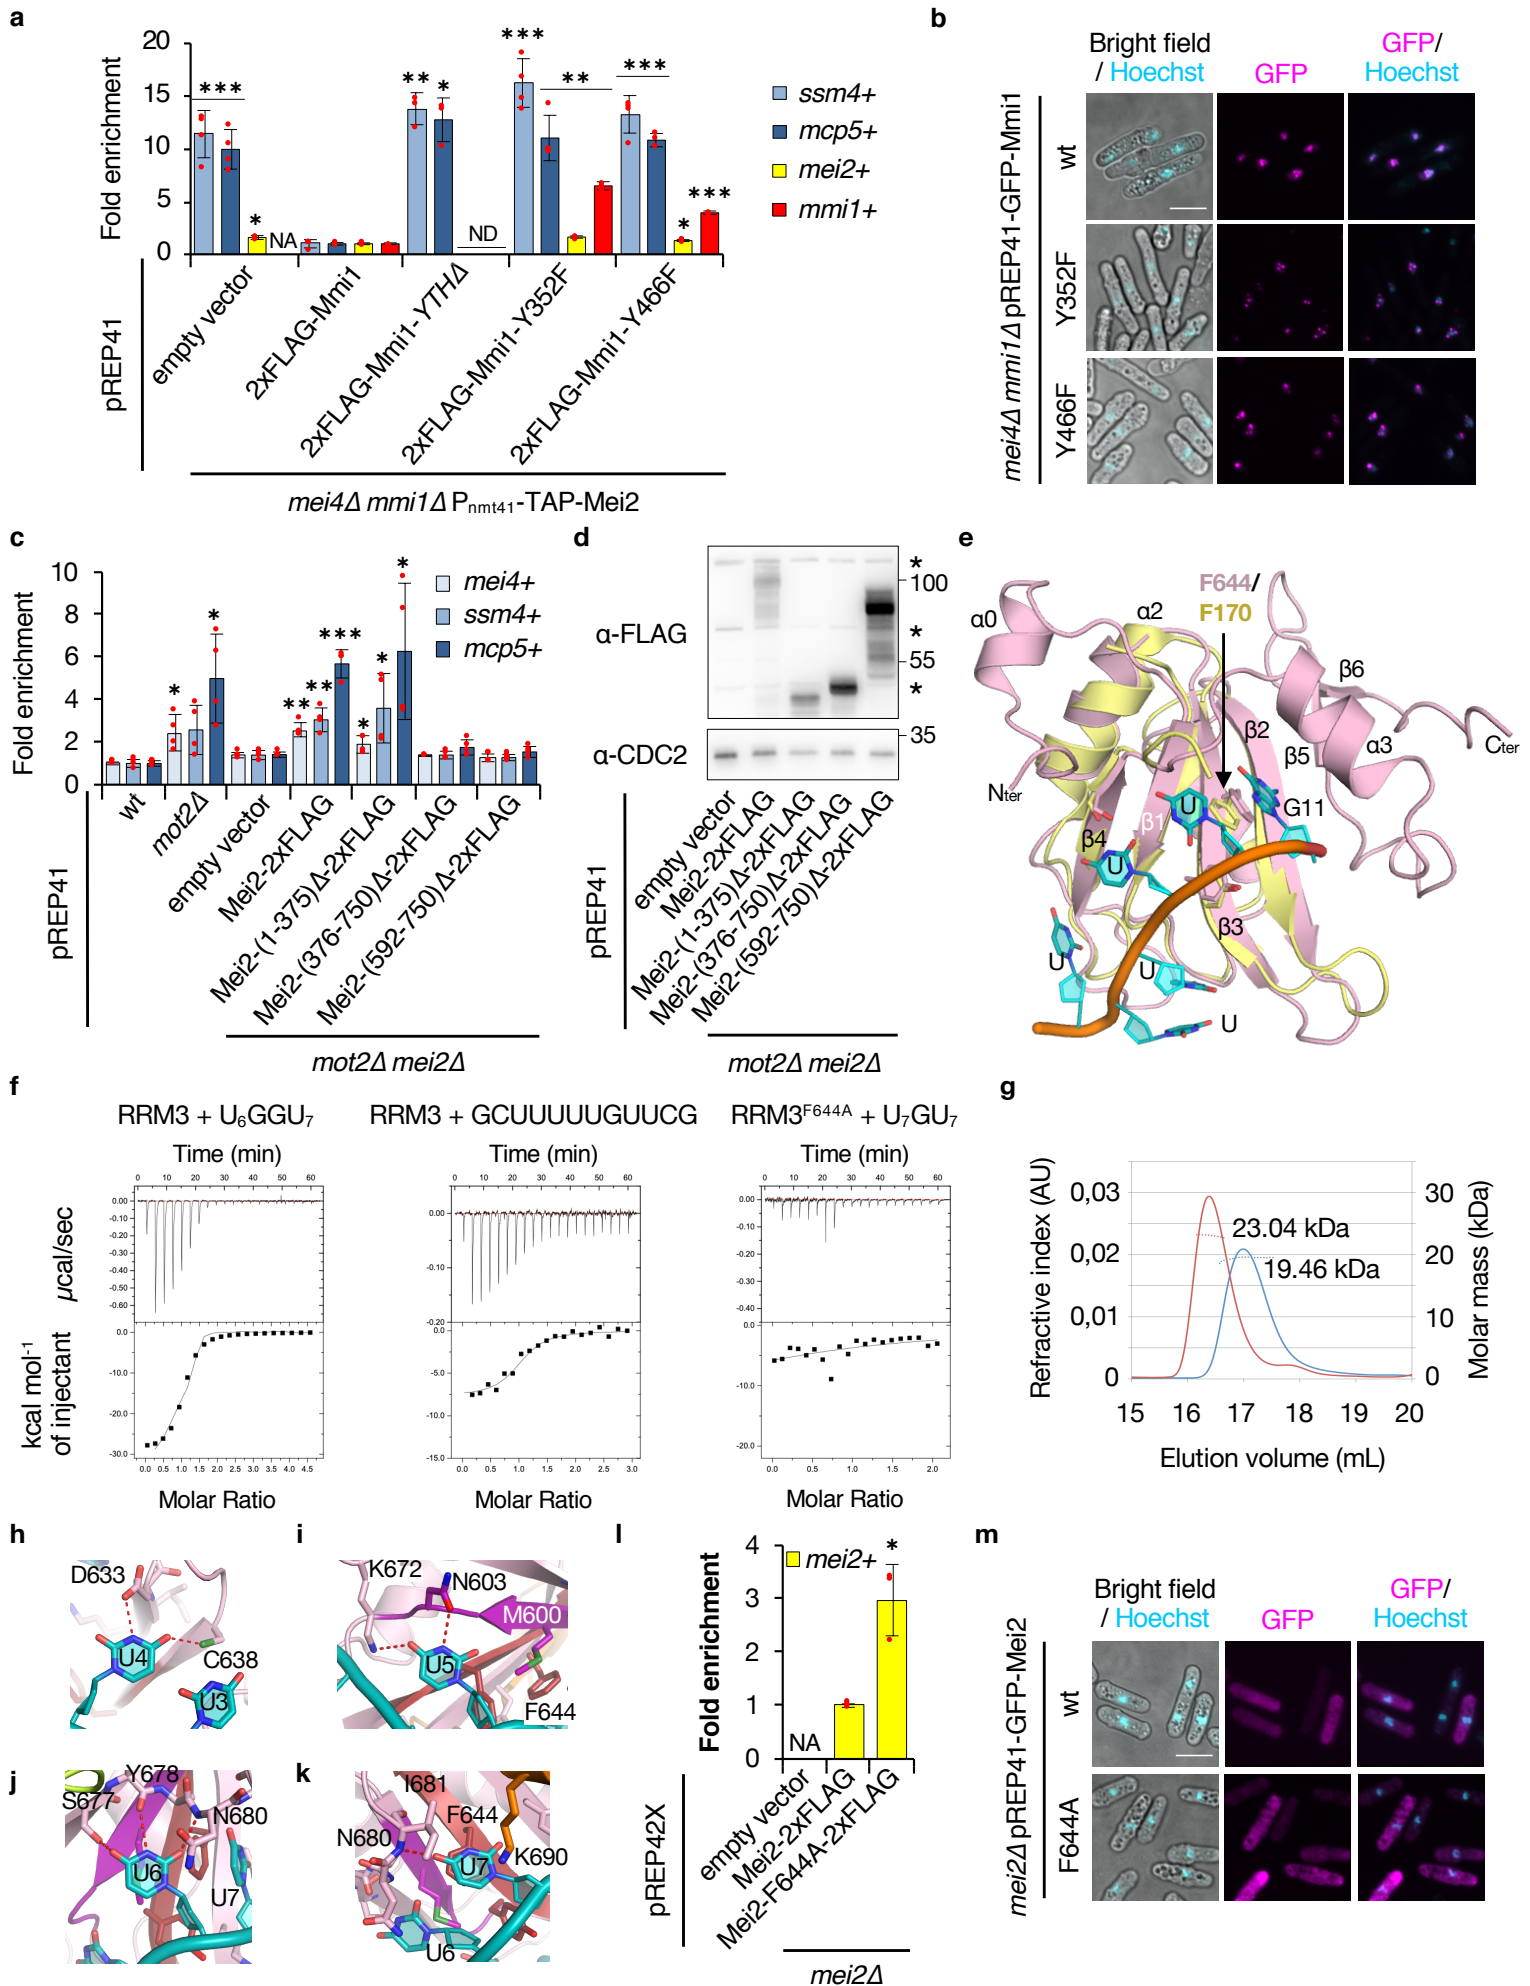

**Supplementary Fig. 1 (related to Fig. 1): Mmi1 and Mei2 RNA-binding activities are required for their mutual control . a**, RT-qPCR analyses of *ssm4+*, *mcp5+*, *mei2+* and *mmi1+* mRNA levels (mean±SD; n=3 or 4; normalized to *act1+* and relative to 2xFLAG-

**Supplementary Fig. 1 (continued):** tagged *wt* Mmi1 in cells of the indicated genetic backgrounds. Student's *t*-test (two-tailed) was used to calculate *p*-values. Relative to cells expressing pREP41-2xFLAG-Mmi1,  $p_{ssm4+/mcp5+/mei2+/mmi1+} = 0.00217 / 0.00237 / 0.017 /$  NA (empty vector);  $0.00327 / 0.01007 / \text{ND} / \text{ND}$  (pREP41-2xFLAG-Mmi1-YTH $\Delta$ );  $0.00073 / 0.00256 / 0.00178 / 0.00114$  (pREP41-2xFLAG-Mmi1-Y352F);  $0.00054 / 0.00004 / 0.01346 / 0.00013$  (pREP41-2xFLAG-Mmi1-Y466F) ( $0.05 > * > 0.01$ ;  $0.01 > ** > 0.001$ ;  $*** < 0.001$ ). NA, not applicable. ND, not determined. Individual data points are represented by red circles. **b**, Representative live cell microscopy images of GFP-tagged *wt* and mutant Mmi1. DNA was stained with Hoechst. The white scale bar represents 10  $\mu\text{m}$ . **c**, RT-qPCR analyses of *mei4+*, *ssm4+* and *mcp5+* meiotic mRNA levels (mean $\pm$ SD;  $n=4$ ; normalized to *act1+* and relative to *wt*) in cells of the indicated genetic backgrounds. Student's *t*-test (two-tailed) was used to calculate *p*-values. Relative to *wt* cells,  $p_{mei4+/ssm4+/mcp5+} = 0.04305 / 0.07036 / 0.03144$  (*mot2* $\Delta$ );  $0.00191 / 0.00311 / 0.00056$  (pREP41-Mei2-2xFLAG);  $0.02121 / 0.04912 / 0.04603$  (pREP41-Mei2-(1-375) $\Delta$ -2xFLAG) ( $0.05 > * > 0.01$ ;  $0.01 > ** > 0.001$ ;  $*** < 0.001$ ). Individual data points are represented by red circles. **d**, Western blots showing total levels of 2xFLAG-tagged constructs of Mei2. Anti-CDC2 antibody was used as loading control. Stars denote non-specific bands. **e**, Superimposition of RRM3<sup>Mei2</sup> (pink) and *Drosophila melanogaster* RRM1<sup>Sxl</sup> (yellow) bound to a U-rich RNA fragment (RNA phosphate backbone in orange and bases in blue; PDB code: 4QQB). RRM3<sup>Mei2</sup> helix  $\alpha 0$  is part of the N-terminal extension (residues 580 to 593) while helix  $\alpha 3$  and  $\beta$ -strands  $\beta 5$  and  $\beta 6$  correspond to the C-terminal extension (residues 684 to 727). Only RRM1<sup>Sxl</sup> domain and a fragment of the RNA are shown. Side chains from Mei2 F644 and Sxl F170, which belong to the GYAE signature from RRM RNP1 motif that is strictly conserved among Mei2-like orthologues and Sxl, are shown as sticks. **f**, Upper panels: ITC data obtained by injecting various RNAs to RRM3<sup>Mei2</sup> or RRM3<sup>Mei2-F644A</sup>. Lower panels: Fitting of the binding curves using a single binding site model. **g**, RRM3<sup>Mei2</sup> is monomeric in solution and binds a single RNA molecule according to SEC-MALLS. Shown are RRM3<sup>Mei2</sup> (blue) and RRM3<sup>Mei2</sup>-RNA (red) elution profiles and the associated molecular weight (dashed lines). The molecular weight of the RNA alone is 4.29 kDa. **h-k**, Detailed representation of U4 (**h**), U5 (**i**), U6 (**j**) and U7 (**k**) binding modes, highlighting the hydrogen bonds (red dashed lines) contributing to the specificity for U. **l**, RT-qPCR analyses of *mei2+* mRNA levels (mean $\pm$ SD;  $n=3$ ; normalized to *act1+* and relative to 2xFLAG-tagged *wt* Mei2) in cells of the indicated genetic backgrounds. Student's *t*-test (two-tailed) was used to calculate *p*-values. Between cells expressing pREP42X-Mei2-2xFLAG and pREP42X-Mei2-F644A-2xFLAG,  $p=0.03583$  ( $0.05 > * > 0.01$ ). Individual data points are represented by red circles. NA, not applicable. **m**, Representative live cell microscopy images of GFP-tagged *wt* and mutant Mei2. DNA was stained with Hoechst. The white scale bar represents 10  $\mu\text{m}$ .

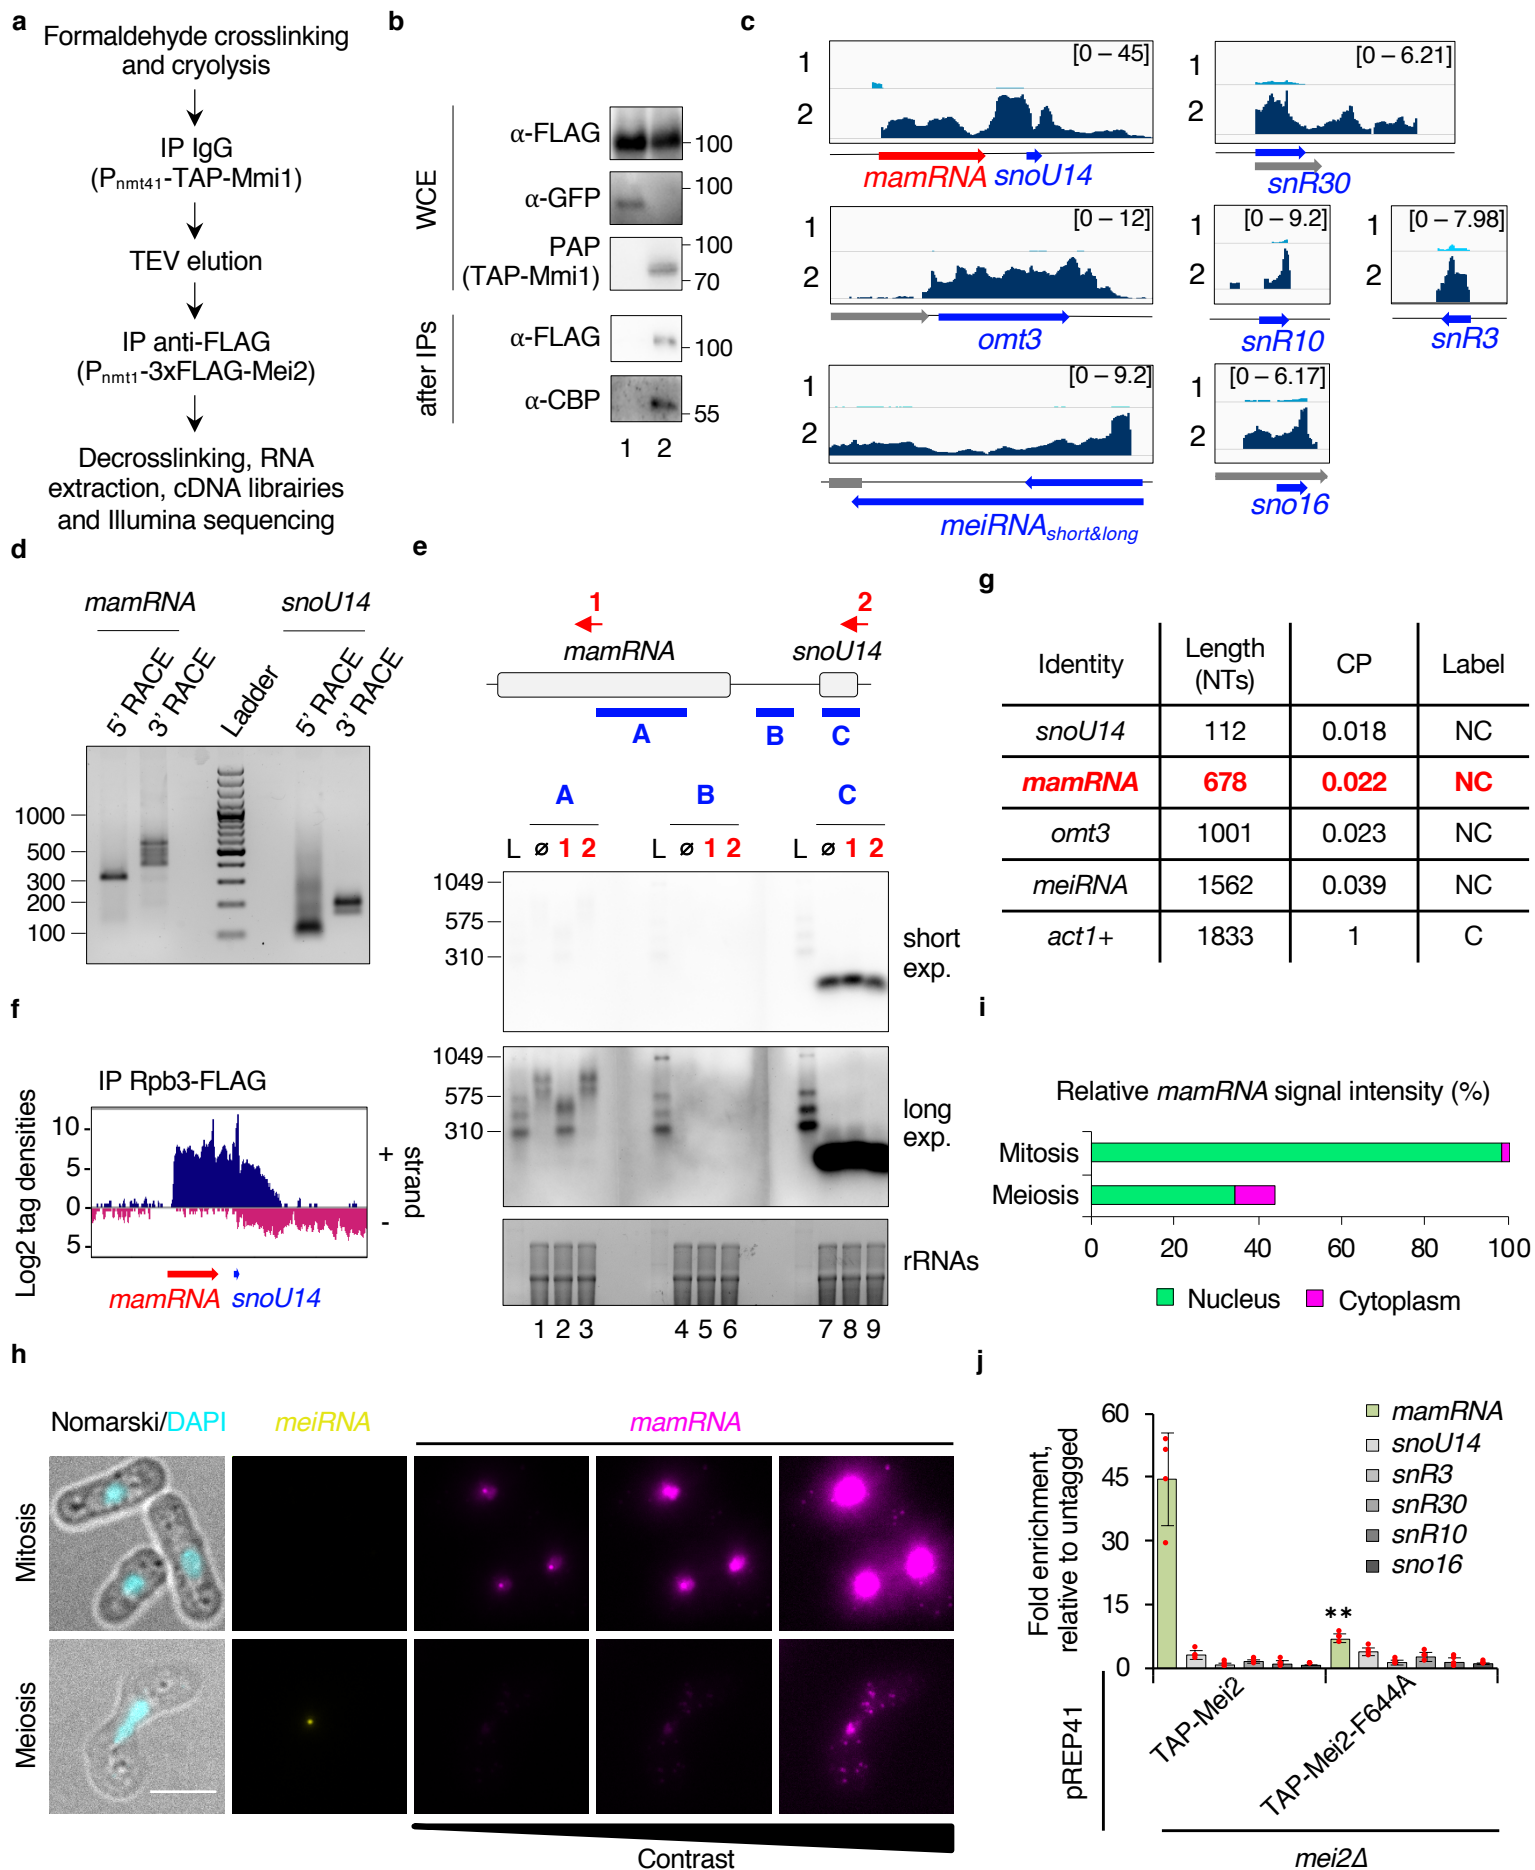

**Supplementary Fig. 2 (related to Fig. 2): Identification of *mamRNA*, an Mmi1 and Mei2-scaffolding lncRNA.** **a**, Scheme depicting the main steps of the seqRIP-seq procedure. To capture transient protein-RNA interactions and to increase the yield of RNA recovery following the two immunoprecipitation steps, a mild formaldehyde crosslinking step was performed. **b**, Western blots showing total and immunoprecipitated levels of Mmi1 and Mei2 in strains used for seqRIP-seq (1: P<sub>nmt41</sub>-GFP-Mmi1 P<sub>nmt1</sub>-3xFLAG-Mei2, negative control / 2: P<sub>nmt41</sub>-TAP-Mmi1 P<sub>nmt1</sub>-3xFLAG-Mei2). PAP, anti-GFP, anti-CBP and anti-FLAG antibodies were used to



**Supplementary Fig. 2 (continued):** detect tagged proteins in the total (WCE) and immunoprecipitated (IP IgG + IP anti-FLAG) fractions. **c**, seqRIP-seq profiles of 8 ncRNAs simultaneously bound by Mmi1 and Mei2 (red dots in **Fig. 2a**). The numbers in square brackets indicate the range of reads corresponding to the enrichments of immunoprecipitated over total RNAs. 1 and 2 refer to strain genotypes as described in **b**. **d**, 5' and 3' RACE analyses of *mamRNA* and *snoU14*. cDNA samples were loaded on a BET-containing 2% agarose gel. Size values of 100 bp DNA ladder are shown on the left side of the gel. **e**, Northern blot analysis of *mamRNA* and *snoU14*. Upper panel: Scheme depicting the *mamRNA* and *snoU14*-encoding genomic locus. The red arrows represent the oligonucleotides used for RNaseH cleavage and the blue rectangles indicate the Northern probes used for transcript detection. Lower panel: Northern blotting showing RNaseH-dependent cleavage of *mamRNA* (probe A) with oligonucleotide 1 but not 2 (lanes 2 and 3), and of *snoU14* (probe C) with oligonucleotide 2 but not 1 (lanes 8 and 9). Samples from reactions performed without oligonucleotides were loaded as controls (lanes 1, 4 and 7). Note that the probe B, designed between *mamRNA* and *snoU14*, does not detect RNA species. **f**, NET-seq profile of the *mamRNA* and *snoU14*-encoding genomic locus. Shown are log2 tag densities corresponding to RNA PolII-immunoprecipitated (FLAG-tagged Rpb3 subunit) RNAs. Tags from the + strand are colored in blue and those from the - strand in magenta. The positions of *mamRNA* and *snoU14* are depicted below the profiles. **g**, Analysis of *mamRNA* coding potential with CPC2 software. Table showing the identity, length (in nucleotides), coding probability (CP) and label (NC=noncoding; C=coding) of 4 ncRNAs (*snoU14*, *mamRNA*, *meiRNA*, *omt3*) and 1 mRNA (*act1+*). **h**, Representative images of *meiRNA* and *mamRNA* detected by smFISH in *wt* mitotic and meiotic cells (horsetail stage of meiotic prophase I). DNA was stained with DAPI. Images are shown as maximum-intensity projections of Z-stacks. Distinct contrast adjustments are shown to compare *mamRNA* signals. The white scale bar represents 5  $\mu\text{m}$ . **i**, Quantification of smFISH analyses shown in panel **h**. Distribution of *mamRNA* signal intensities (integrated densities) from areas corresponding to the nucleus and cytoplasm of mitotic (n=53) and meiotic (n=52) cells, expressed as percentages of the total signal in mitosis. **j**, Fold enrichments (mean $\pm$ SD; n=4; relative to untagged) of 5 sn/snoRNAs and *mamRNA* upon pulldown of TAP-tagged *wt* or mutant (F644A) Mei2. Student's t-test (two-tailed) was used to calculate *p*-values. Between cells expressing pREP41-TAP-Mei2 and pREP41-TAP-Mei2-F644A, *p*=0.00608 (*mamRNA*) (0.01>**\*\***>0.001). Individual data points are represented by red circles.

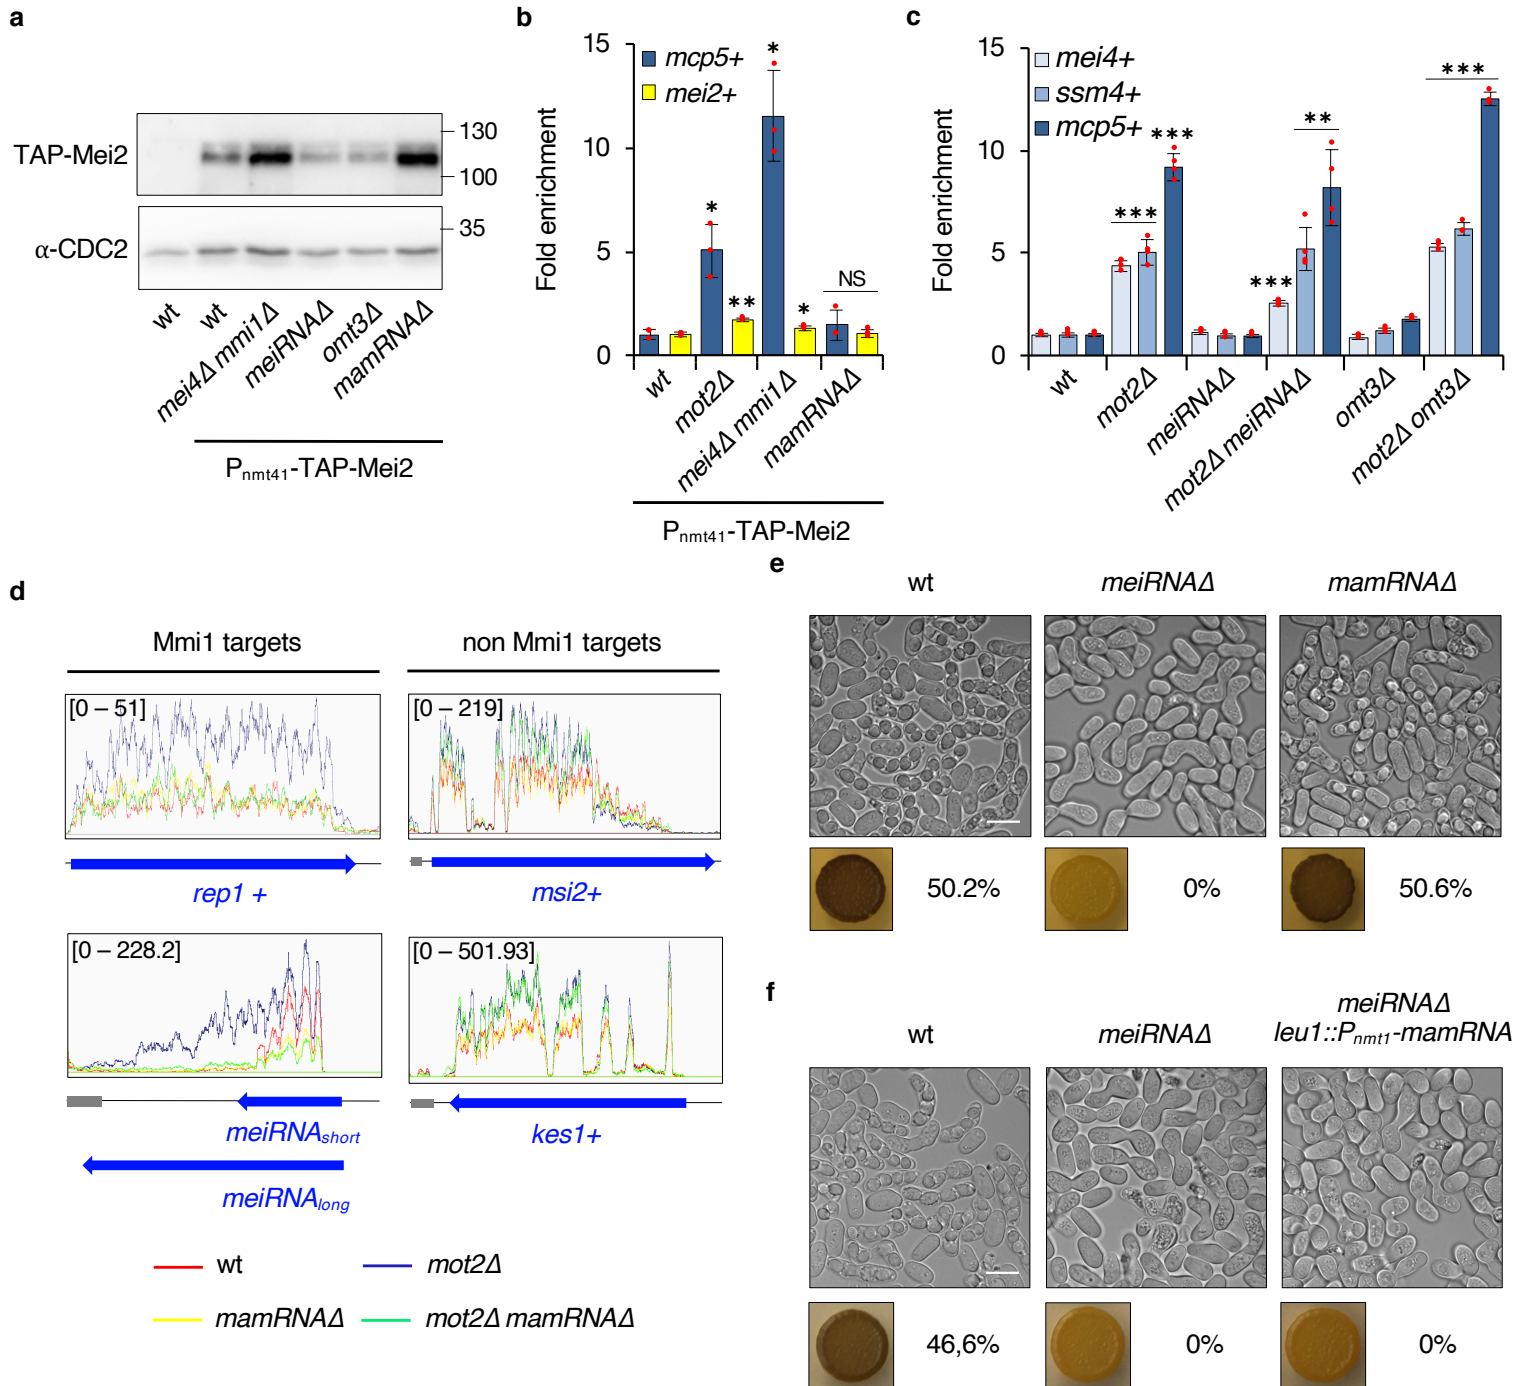

**Supplementary Fig. 3 (related to Fig. 3): *mamRNA* mediates the Mmi1-Mei2 mutual control.** **a**, Western blots showing total TAP-tagged Mei2 levels in cells of the indicated genetic backgrounds. Anti-CDC2 antibody was used as loading control. **b** and **c**, RT-qPCR analyses of *mei2+*, *mei4+*, *ssm4+* and *mcp5+* meiotic mRNA levels (mean $\pm$ SD; n=3 or 4; normalized to *act1+* and relative to *wt*) in cells of the indicated genetic backgrounds. Student's *t*-test (two-tailed) was used to calculate *p*-values. Relative to *wt* cells in **b**,  $p_{mcp5+/mei2+} = 0.02856 / 0.0014$  (*mot2Δ*);  $0.01327 / 0.03395$  (*mei4Δ mmi1Δ*);  $0.40797 / 0.74937$  (*mamRNAΔ*). Relative to *wt* cells in **c**,  $p_{mei4+/ssm4+/mcp5+} = 0.00004 / 0.0008 / 0.00013$  (*mot2Δ*);  $7.4 \times 10^{-6} / 0.00386 / 0.00443$  (*mot2Δ meiRNAΔ*);  $0.00012 / 0.00052 / 0.00018$  (*mot2Δ omt3Δ*). ( $0.05 > * > 0.01$ ;  $0.01 > ** > 0.001$ ;  $*** < 0.001$ ). NS, not significant. Individual data points are represented by red circles. **d**, RNA-seq profiles of 4 genes upregulated in *mot2Δ* cells in a *mamRNA*-dependent (left; Mmi1 targets) or -independent (right; non Mmi1 targets) manner (mean; n=2). **e** and **f**, Mating/sporulation efficiencies of the indicated homothallic strains (% tetrads), as determined by iodine staining and live cell imaging. In **e**,  $n_{wt}=496$  cells;  $n_{meiRNAΔ}=500$ ;  $n_{mamRNAΔ}=502$ . In **f**,  $n_{wt}=785$  cells;  $n_{meiRNAΔ}=762$ ;  $n_{meiRNAΔ leu1::Pnmt1-mamRNA}=730$ . White scale bars represent 10  $\mu$ m.

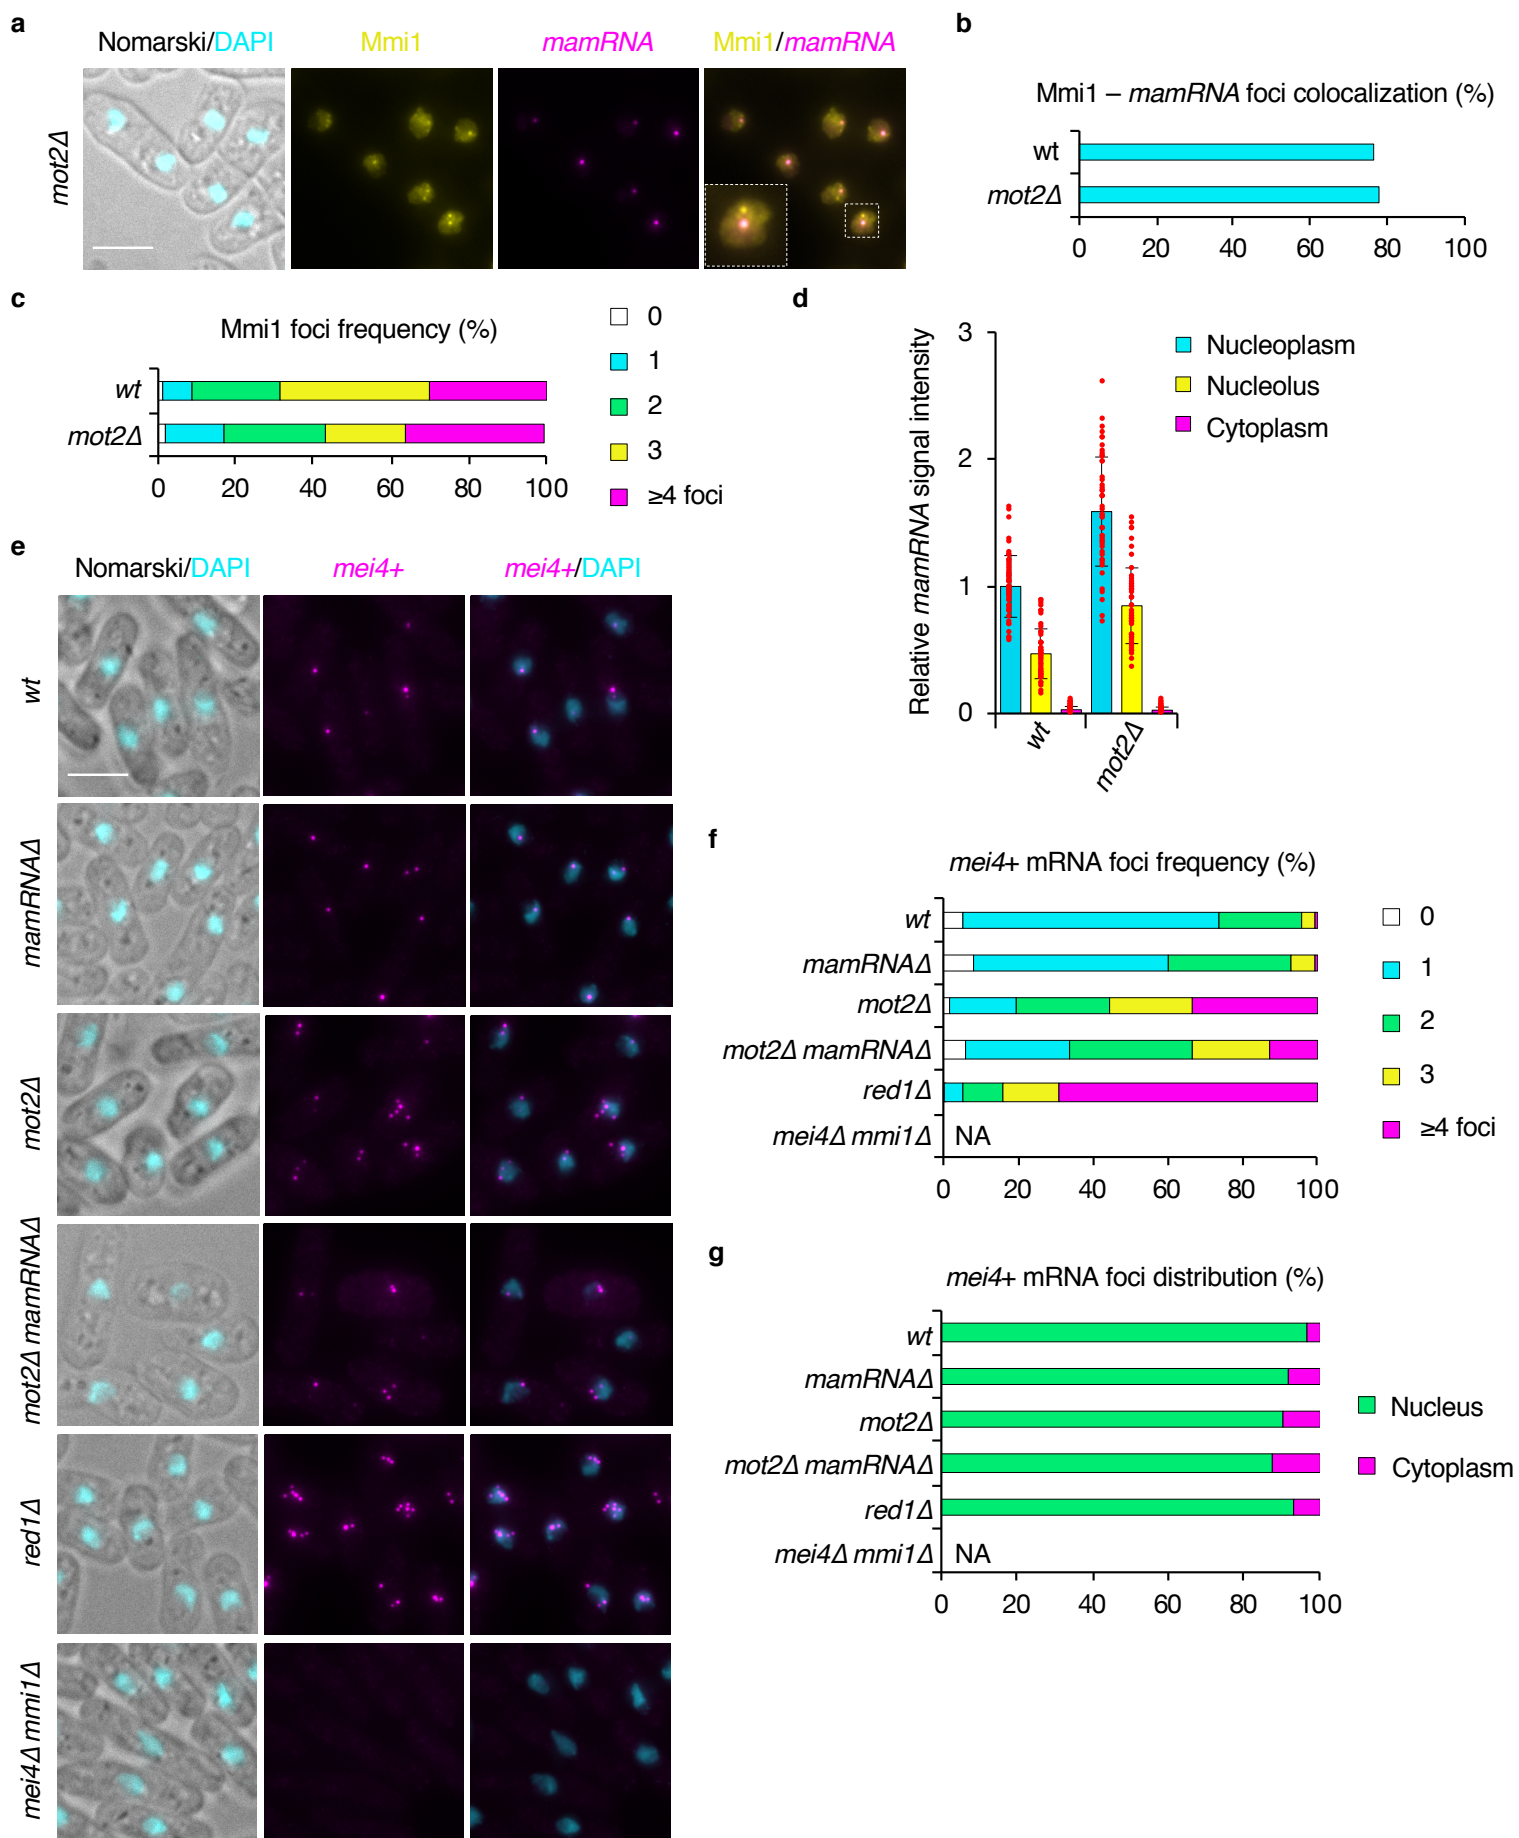

**Supplementary Fig. 4 (related to Fig. 4): Subcellular localization of Mmi1, *mamRNA* and meiotic mRNAs.** **a**, Representative images of *mamRNA* detected by smFISH in *mot2Δ* cells. DNA was stained with DAPI. GFP-tagged Mmi1 was visualized in parallel. Images are shown as maximum-intensity projections of Z-stacks. The white scale bar represents 5  $\mu$ m. **b**, Quantification of Mmi1 and *mamRNA* colocalization in wt and *mot2Δ* cells, expressed as the fraction of *mamRNA* spots colocalizing with Mmi1 nuclear bodies (%;  $n_{wt}=703$  nuclei;  $n_{mot2\Delta}=579$ ). **c**, Quantification of Mmi1 nuclear bodies. Shown is the distribution of Mmi1 foci frequency per nucleus in wt and *mot2Δ* cells (%;  $n_{wt}=549$  nuclei;  $n_{mot2\Delta}=592$ ). **d**, Quantification of smFISH analyses. Shown are the *mamRNA*

**Supplementary Fig. 4 (continued):** signal intensities from areas corresponding to the nucleoplasm, nucleolus and cytoplasm in *mot2Δ* cells (integrated densities relative to nucleoplasmic average; mean±SD; n=50 cells). Data for *wt* cells are also displayed in **Fig. 2d**. Individual data points are represented by red circles. **e**, Representative images of *mei4+* mRNAs detected by smFISH in cells of the indicated genetic backgrounds. DNA was stained with DAPI. Images are shown as maximum-intensity projections of Z-stacks. The white scale bar represents 5 μm. **f** and **g**, Quantifications of smFISH analyses shown in **e**. **f**, Distribution of *mei4+* mRNA foci frequency per cell ( $n_{wt}=711$  cells;  $n_{mamRNAΔ}=703$ ;  $n_{mot2Δ}=502$ ;  $n_{mot2ΔmamRNAΔ}=579$ ;  $n_{red1Δ}=479$ ). **g**, Distribution of *mei4+* mRNA foci localization ( $n_{wt}=895$  foci;  $n_{mamRNAΔ}=972$ ;  $n_{mot2Δ}=1531$ ;  $n_{mot2ΔmamRNAΔ}=1228$ ;  $n_{red1Δ}=1016$ ). NA, not applicable.

**Supplementary Table 1: Structural characterization of RRM3<sup>Mei2</sup>**

| <b>Data collection</b>           |                                       |                                       |                                       |
|----------------------------------|---------------------------------------|---------------------------------------|---------------------------------------|
|                                  | <b>RRM3<sup>Mei2</sup> apo</b>        |                                       | <b>RRM3<sup>Mei2</sup>-RNA</b>        |
|                                  | Se-SAD                                | High resolution                       |                                       |
| Space group                      | P4 <sub>1</sub>                       | P4 <sub>1</sub>                       | I222                                  |
| Unit cell parameters             | 75.1Å; 75.1Å; 67.8Å;<br>90°; 90°; 90° | 75.5Å; 75.5Å; 70.8Å;<br>90°; 90°; 90° | 75.3Å; 81.5Å; 81.4Å;<br>90°; 90°; 90° |
| Wavelength (Å)                   | 0.9080105                             | 0.9080105                             | 0.9080105                             |
| Resolution (Å)                   | 41.8-2.5 (2.59-2.5)                   | 42.63-1.9 (1.94-1.9)                  | 40.5-2.65 (2.78-2.65)                 |
| R <sub>merge</sub> (%)           | 8.1 (120.4)                           | 5.8 (84.8)                            | 25.4 (167.3)                          |
| <i>I</i> / $\sigma I$            | 14 (1.3)                              | 11.1 (1.3)                            | 6.4 (1.2)                             |
| Completeness (%)                 | 99.0 (92.4)                           | 99.0 (89.6)                           | 99.6 (97.7)                           |
| CC <sub>1/2</sub> (%)            | 99.7 (43.1)                           |                                       | 98.6 (72.8)                           |
| Redundancy                       | 6.5                                   | 3.7                                   | 11.4                                  |
| Observed reflections             | 86530                                 | 117825                                | 83891                                 |
| Unique reflections               | 13280                                 | 31476                                 | 7387                                  |
| <b>Refinement</b>                |                                       |                                       |                                       |
| Resolution (Å)                   |                                       | 42.63-1.9                             | 40.7-2.63                             |
| R / R <sub>free</sub> (%)        |                                       | 17.1 / 19.4                           | 22.3 / 29.8                           |
| <i>Number of atoms</i>           |                                       |                                       |                                       |
| Protein / RNA                    |                                       | 2380                                  | 1199 / 246                            |
| Water                            |                                       | 187                                   | 30                                    |
| Others                           |                                       | 92                                    |                                       |
| <i>B-factors (Å<sup>2</sup>)</i> |                                       |                                       |                                       |
| Protein / RNA                    |                                       | 44.3                                  | 61.8 / 66.7                           |
| Water                            |                                       | 46.2                                  | 52.2                                  |
| Others                           |                                       | 76.3                                  |                                       |
| <i>R.m.s deviations</i>          |                                       |                                       |                                       |
| Bond lengths (Å)                 |                                       | 0.01                                  | 0.01                                  |
| Bond angles (°)                  |                                       | 0.98                                  | 1.07                                  |
| PDB code                         |                                       | 6YYL                                  | 6YYM                                  |

**Supplementary Table 2: Thermodynamic parameters for RNA binding to RRM3<sup>Mei2</sup>**

| <b>Protein</b>                            | <b>RNA</b>                                       | <b>Kd (nM)</b>     | <b>N</b> | <b><math>\Delta H</math><br/>(kcal/mol)</b> | <b>T<math>\Delta S</math><br/>(kcal/mol)</b> |
|-------------------------------------------|--------------------------------------------------|--------------------|----------|---------------------------------------------|----------------------------------------------|
| RRM3 <sup>Mei2</sup><br>(9 $\mu$ M)       | U <sub>7</sub> GU <sub>7</sub><br>(140 $\mu$ M)  | 145 $\pm$ 26       | 1        | -21.31 $\pm$ 0.33                           | -12.13                                       |
| RRM3 <sup>Mei2</sup><br>(9 $\mu$ M)       | U <sub>6</sub> GGU <sub>7</sub><br>(220 $\mu$ M) | 435 $\pm$ 111.8    | 1        | -29.07 $\pm$ 0.9                            | -20.54                                       |
| RRM3 <sup>Mei2</sup><br>(9 $\mu$ M)       | U <sub>15</sub><br>(130 $\mu$ M)                 | 1432.6 $\pm$ 194.2 | 1        | -15.82 $\pm$ 0.43                           | -7.97                                        |
| RRM3 <sup>Mei2</sup><br>(9 $\mu$ M)       | GCUUUUUGUUCG<br>(140 $\mu$ M)                    | 555 $\pm$ 166.5    | 1        | -7.7 $\pm$ 0.3                              | 0.69                                         |
| RRM3 <sup>Mei2-F644A</sup><br>(9 $\mu$ M) | U <sub>7</sub> GU <sub>7</sub><br>(140 $\mu$ M)  | ND                 | ND       | ND                                          | ND                                           |

ND: not detectable



**Supplementary Table 3: Hydrogen bonds at the RRM3<sup>Mei2</sup>-RNA interface**

| <b>RRM3<sup>Mei2</sup></b> |             | <b>RNA</b>  |             |
|----------------------------|-------------|-------------|-------------|
| <b>Residue</b>             | <b>Atom</b> | <b>Base</b> | <b>Atom</b> |
| K607                       | N           | <b>C2</b>   | O2          |
| F668                       | O           | <b>C2</b>   | O2'         |
| N606                       | N           | <b>U3</b>   | OP2         |
| S670                       | Og          | <b>U3</b>   | OP1         |
| C638                       | Sg          | <b>U4</b>   | O4          |
| K672                       | Nz          | <b>U4</b>   | OP2         |
| D633                       | Od1         | <b>U4</b>   | N3          |
| K672                       | Nz          | <b>U5</b>   | O4          |
| N603                       | Od1         | <b>U5</b>   | N3          |
| Y678                       | O           | <b>U6</b>   | N3          |
| S677                       | Og          | <b>U6</b>   | O4          |
| N680                       | N           | <b>U6</b>   | O2          |
| N680                       | Nd2         | <b>U6</b>   | O2'         |
| I681                       | N           | <b>U7</b>   | O4          |
| R631                       | Nh1         | <b>G8</b>   | O4'         |
| I632                       | O           | <b>G8</b>   | N2          |
| Y629                       | Oh          | <b>G8</b>   | N2          |
| I632                       | O           | <b>G8</b>   | N1          |
| F634                       | N           | <b>G8</b>   | O6          |
| C695                       | Sg          | <b>G8</b>   | O2'         |
| Y629                       | Oh          | <b>G8</b>   | OP2         |
| D633                       | Od1         | <b>G12</b>  | N2          |

**Supplementary Table 4: *S. pombe* strains used in this study**

| Strain | Genotype                                                                                                    | Source                 |
|--------|-------------------------------------------------------------------------------------------------------------|------------------------|
| PR040  | h90, <i>ura4-DS/E</i> , <i>ade6-M210</i> , <i>leu1-32</i> , <i>mat3M::ura4+</i>                             | Simonetti et al., 2017 |
| PR162  | h90, <i>ura4-D18</i> , <i>ade6-M210</i> , <i>leu1-32</i> , <i>mat3M(EcoRV)::ade6+</i>                       | JP Javerzat            |
| PR411  | PR040, <i>mei4::nat<sup>R</sup>MX mmi1::hph<sup>R</sup>MX</i>                                               | Simonetti et al., 2017 |
| PR525  | PR162, <i>mot2::nat<sup>R</sup>MX</i>                                                                       | This study             |
| PR597  | PR040, <i>kan<sup>R</sup>MX::P<sub>nmt41</sub>-3xFLAG-Mmi1</i>                                              | Simonetti et al., 2017 |
| PR617  | PR040, <i>sme2::hph<sup>R</sup>MX</i>                                                                       | This study             |
| PR640  | PR040, <i>mot2::nat<sup>R</sup>MX sme2::hph<sup>R</sup>MX</i>                                               | This study             |
| PR675  | PR040, <i>kan<sup>R</sup>MX::P<sub>nmt41</sub>-TAP-Mei2</i>                                                 | Simonetti et al., 2017 |
| PR676  | PR040, <i>Mei2-GFP::kan<sup>R</sup>MX</i>                                                                   | Simonetti et al., 2017 |
| PR718  | PR040, <i>sme2::hph<sup>R</sup>MX kan<sup>R</sup>MX::P<sub>nmt41</sub>-TAP-Mei2</i>                         | This study             |
| PR720  | PR040, <i>mot2::nat<sup>R</sup>MX kan<sup>R</sup>MX::P<sub>nmt41</sub>-TAP-Mei2</i>                         | Simonetti et al., 2017 |
| PR726  | PR040, <i>mei4::nat<sup>R</sup>MX mmi1::hph<sup>R</sup>MX kan<sup>R</sup>MX::P<sub>nmt41</sub>-TAP-Mei2</i> | Simonetti et al., 2017 |
| PR792  | PR040, <i>mot2::nat<sup>R</sup>MX</i>                                                                       | Simonetti et al., 2017 |
| PR793  | PR040, <i>mot2::nat<sup>R</sup>MX kan<sup>R</sup>MX::P<sub>nmt41</sub>-3xFLAG-Mmi1</i>                      | This study             |
| PR808  | PR040, <i>pREP41::LEU2</i>                                                                                  | This study             |
| PR810  | PR040, <i>mot2::nat<sup>R</sup>MX pREP41::LEU2</i>                                                          | This study             |
| PR911  | PR040, <i>mot2::nat<sup>R</sup>MX mei2::hph<sup>R</sup>MX pREP41::LEU2</i>                                  | This study             |
| PR965  | PR040, <i>mot2::nat<sup>R</sup>MX mei2::hph<sup>R</sup>MX pREP41-Mei2-(376-750)Δ-2xFLAG::LEU2</i>           | This study             |
| PR966  | PR040, <i>mot2::nat<sup>R</sup>MX mei2::hph<sup>R</sup>MX pREP41-Mei2-(592-750)Δ-2xFLAG::LEU2</i>           | This study             |
| PR968  | PR040, <i>mot2::kan<sup>R</sup>MX</i>                                                                       | Simonetti et al., 2017 |
| PR980  | PR040, <i>mot2::nat<sup>R</sup>MX mei2::hph<sup>R</sup>MX pREP41-Mei2-2xFLAG::LEU2</i>                      | This study             |
| PR981  | PR040, <i>mot2::nat<sup>R</sup>MX mei2::hph<sup>R</sup>MX pREP41-Mei2-(1-375)Δ-2xFLAG::LEU2</i>             | This study             |

|        |                                                                                                                                                                |            |
|--------|----------------------------------------------------------------------------------------------------------------------------------------------------------------|------------|
| PR1021 | PR040, omt3:: <i>hph<sup>R</sup>MX</i>                                                                                                                         | This study |
| PR1026 | PR040, mei4:: <i>nat<sup>R</sup>MX</i> mmi1:: <i>hph<sup>R</sup>MX kan<sup>R</sup>MX::P<sub>nmt41</sub>-TAP-Mei2</i><br>pREP41:: <i>LEU2</i>                   | This study |
| PR1027 | PR040, mot2:: <i>nat<sup>R</sup>MX</i> omt3:: <i>hph<sup>R</sup>MX</i>                                                                                         | This study |
| PR1033 | PR040, <i>kan<sup>R</sup>MX::P<sub>nmt41</sub>-GFP-Mmi1</i>                                                                                                    | This study |
| PR1034 | PR040, mei2:: <i>hph<sup>R</sup>MX</i> pREP41:: <i>LEU2</i>                                                                                                    | This study |
| PR1035 | PR040, mei4:: <i>nat<sup>R</sup>MX</i> mmi1:: <i>hph<sup>R</sup>MX kan<sup>R</sup>MX::P<sub>nmt41</sub>-TAP-Mei2</i><br>pREP41-2xFLAG-Mmi1:: <i>LEU2</i>       | This study |
| PR1036 | PR040, mot2:: <i>nat<sup>R</sup>MX kan<sup>R</sup>MX ::P<sub>nmt41</sub>-GFP-Mmi1</i>                                                                          | This study |
| PR1037 | PR040, mei4:: <i>nat<sup>R</sup>MX</i> mmi1:: <i>hph<sup>R</sup>MX kan<sup>R</sup>MX::P<sub>nmt41</sub>-TAP-Mei2</i><br>pREP41-2xFLAG-Mmi1-YTHΔ:: <i>LEU2</i>  | This study |
| PR1038 | PR040, mei4:: <i>nat<sup>R</sup>MX</i> mmi1:: <i>hph<sup>R</sup>MX kan<sup>R</sup>MX::P<sub>nmt41</sub>-TAP-Mei2</i><br>pREP41-2xFLAG-Mmi1-Y352F:: <i>LEU2</i> | This study |
| PR1039 | PR040, mei4:: <i>nat<sup>R</sup>MX</i> mmi1:: <i>hph<sup>R</sup>MX kan<sup>R</sup>MX::P<sub>nmt41</sub>-TAP-Mei2</i><br>pREP41-2xFLAG-Mmi1-Y466F:: <i>LEU2</i> | This study |
| PR1056 | PR040, mei4:: <i>nat<sup>R</sup>MX</i> mmi1:: <i>hph<sup>R</sup>MX</i> pREP41-2xFLAG-<br>Mmi1:: <i>LEU2</i>                                                    | This study |
| PR1105 | PR040, omt3:: <i>hph<sup>R</sup>MX kan<sup>R</sup>MX::P<sub>nmt41</sub>-TAP-Mei2</i>                                                                           | This study |
| PR1122 | PR040, <i>nat<sup>R</sup>MX::P<sub>nmt1</sub>-3xFLAG-Mei2 kan<sup>R</sup>MX::P<sub>nmt41</sub>-TAP-Mmi1</i>                                                    | This study |
| PR1141 | PR162, pREP42X:: <i>URA4</i>                                                                                                                                   | This study |
| PR1142 | PR162, mei2:: <i>hph<sup>R</sup>MX</i> pREP42X:: <i>URA4</i>                                                                                                   | This study |
| PR1143 | PR162, mei2:: <i>hph<sup>R</sup>MX</i> pREP42X-Mei2-2xFLAG:: <i>URA4</i>                                                                                       | This study |
| PR1144 | PR162, mei2:: <i>hph<sup>R</sup>MX</i> pREP42X-Mei2-F644A-2xFLAG:: <i>URA4</i>                                                                                 | This study |
| PR1147 | PR162, mot2:: <i>nat<sup>R</sup>MX</i> mei2:: <i>kan<sup>R</sup>MX</i> pREP42X:: <i>URA4</i>                                                                   | This study |
| PR1149 | PR162, mot2:: <i>nat<sup>R</sup>MX</i> mei2:: <i>kan<sup>R</sup>MX</i> pREP42X-Mei2-F644A-<br>2xFLAG:: <i>URA4</i>                                             | This study |
| PR1159 | PR162, mot2:: <i>nat<sup>R</sup>MX</i> pREP42X:: <i>URA4</i>                                                                                                   | This study |
| PR1163 | PR162, mot2:: <i>nat<sup>R</sup>MX</i> mei2:: <i>kan<sup>R</sup>MX</i> pREP42X-Mei2-<br>2xFLAG:: <i>URA4</i>                                                   | This study |
| PR1168 | PR040, <i>nat<sup>R</sup>MX::P<sub>nmt1</sub>-3xFLAG-Mei2 kan<sup>R</sup>MX::P<sub>nmt41</sub>-GFP-Mmi1</i>                                                    | This study |
| PR1208 | PR040, <i>hph<sup>R</sup>MX::P<sub>nmt41</sub>-GFP-Mmi1</i>                                                                                                    | This study |
| PR1225 | PR040, mot2:: <i>nat<sup>R</sup>MX hph<sup>R</sup>MX::P<sub>nmt41</sub>-GFP-Mmi1</i>                                                                           | This study |

|        |                                                                                                                                                                |            |
|--------|----------------------------------------------------------------------------------------------------------------------------------------------------------------|------------|
| PR1228 | PR040, mamRNA:: <i>nat<sup>R</sup>MX</i>                                                                                                                       | This study |
| PR1238 | PR040, mamRNA:: <i>nat<sup>R</sup>MX kan<sup>R</sup>MX::P<sub>nmt41</sub>-TAP-Mei2</i>                                                                         | This study |
| PR1239 | PR040, mot2:: <i>kan<sup>R</sup>MX mamRNA::<i>nat<sup>R</sup>MX</i></i>                                                                                        | This study |
| PR1242 | PR040, mamRNA:: <i>nat<sup>R</sup>MX hph<sup>R</sup>MX::P<sub>nmt41</sub>-GFP-Mmi1</i>                                                                         | This study |
| PR1310 | PR040, mot2:: <i>kan<sup>R</sup>MX mamRNA::<i>nat<sup>R</sup>MX hph<sup>R</sup>MX::P<sub>nmt41</sub>-GFP-Mmi1</i></i>                                          | This study |
| PR1316 | PR040, mei4:: <i>nat<sup>R</sup>MX mmi1::hph<sup>R</sup>MX pREP41::LEU2</i>                                                                                    | This study |
| PR1317 | PR040, mei4:: <i>nat<sup>R</sup>MX mmi1::hph<sup>R</sup>MX pREP41-2xFLAG-Mmi1-Y352F::LEU2</i>                                                                  | This study |
| PR1318 | PR040, mei4:: <i>nat<sup>R</sup>MX mmi1::hph<sup>R</sup>MX pREP41-2xFLAG-Mmi1-Y466F::LEU2</i>                                                                  | This study |
| PR1338 | PR040, mot2:: <i>nat<sup>R</sup>MX mamRNA::<i>hph<sup>R</sup>MX kan<sup>R</sup>MX::P<sub>nmt41</sub>-TAP-Mei2</i></i>                                          | This study |
| PR1340 | PR040, mei4:: <i>nat<sup>R</sup>MX mmi1::hph<sup>R</sup>MX pREP41-GFP-Mmi1::LEU2</i>                                                                           | This study |
| PR1341 | PR040, mei4:: <i>nat<sup>R</sup>MX mmi1::hph<sup>R</sup>MX pREP41-GFP-Mmi1-Y352F::LEU2</i>                                                                     | This study |
| PR1342 | PR040, mei4:: <i>nat<sup>R</sup>MX mmi1::hph<sup>R</sup>MX pREP41-GFP-Mmi1-Y466F::LEU2</i>                                                                     | This study |
| PR1349 | PR040, mamRNA:: <i>hph<sup>R</sup>MX kan<sup>R</sup>MX::P<sub>nmt41</sub>-TAP-Mei2</i>                                                                         | This study |
| PR1377 | PR040, sme2:: <i>hph<sup>R</sup>MX pREP41-GFP-Mei2::LEU2</i>                                                                                                   | This study |
| PR1393 | PR040, sme2:: <i>hph<sup>R</sup>MX pREP41-GFP-Mei2-NLS::LEU2</i>                                                                                               | This study |
| PR1394 | PR040, sme2:: <i>hph<sup>R</sup>MX mamRNA::<i>nat<sup>R</sup>MX pREP41-GFP-Mei2-NLS::LEU2</i></i>                                                              | This study |
| PR1407 | PR040, mei2:: <i>hph<sup>R</sup>MX pREP41-TAP-Mei2::LEU2</i>                                                                                                   | This study |
| PR1408 | PR040, mei2:: <i>hph<sup>R</sup>MX pREP41-TAP-Mei2-F644A::LEU2</i>                                                                                             | This study |
| PR1436 | PR040, red1:: <i>nat<sup>R</sup>MX kan<sup>R</sup>MX::P<sub>nmt41</sub>-GFP-Mmi1</i>                                                                           | This study |
| PR1455 | PR040, mamRNA:: <i>hph<sup>R</sup>TK kan<sup>R</sup>MX::P<sub>nmt41</sub>-TAP-Mei2</i>                                                                         | This study |
| PR1459 | PR040, mot2:: <i>kan<sup>R</sup>MX mamRNA::<i>hph<sup>R</sup>TK</i></i>                                                                                        | This study |
| PR1525 | h90, <i>ura4-DS/E, ade6-M210, mat3M::ura4+</i> , mamRNA:: <i>nat<sup>R</sup>MX kan<sup>R</sup>MX::P<sub>nmt41</sub>-TAP-Mei2 leu1::P<sub>nmt1</sub>-snoU14</i> | This study |
| PR1526 | h90, <i>ura4-DS/E, ade6-M210, mat3M::ura4+</i> , mamRNA:: <i>nat<sup>R</sup>MX kan<sup>R</sup>MX::P<sub>nmt41</sub>-TAP-Mei2 leu1::P<sub>nmt1</sub>-mamRNA</i> | This study |
| PR1611 | h90, <i>ura4-DS/E, ade6-M210, mat3M::ura4+</i> , sme2:: <i>hph<sup>R</sup>MX leu1::P<sub>nmt1</sub>-mamRNA</i>                                                 | This study |

**Supplementary Table 5: oligonucleotides used in this study**

| Primers                  | Sequence                       | Assays | Figures                                     |
|--------------------------|--------------------------------|--------|---------------------------------------------|
| P249: <i>mei4+</i> fwd   | 5'-TGGATCAGATCCGTGGAATC-3'     | qPCR   | 1j, 3c, 4e, S1c, S3c                        |
| P250: <i>mei4+</i> rev   | 5'-AACGCTCGATTAGAAGGCAT-3'     |        |                                             |
| P253: <i>act1+</i> fwd   | 5'-AACCCCTCAGCTTTGGGTCTT-3'    |        | 1c, 1h, 1j, 3c, 4e, S1a, S1c, S11, S3b, S3c |
| P254: <i>act1+</i> rev   | 5'-TTTGCATACGATCGGCAATA-3'     |        |                                             |
| P325: <i>ssm4+</i> fwd   | 5'-ACACAGTTTACGGGATTCTA-3'     |        | 1c, 1j, 3c, S1a, S1c, S3c                   |
| P326: <i>ssm4+</i> rev   | 5'-GATTGTGATGAAAACCTGGGT-3'    |        |                                             |
| P337: <i>mmi1+</i> rev   | 5'-AAGGCCATTCGTAGGAGTGA-3'     |        | S1a                                         |
| P451: <i>mmi1+</i> fwd   | 5'-CACCTCTGAAAAGACCTGCA-3'     |        |                                             |
| P573: <i>meiRNA</i> fwd  | 5'-GGATGAATAGTAGCTTAGAT-3'     |        | 1h, 2f, 4e                                  |
| P574: <i>meiRNA</i> rev  | 5'-GCTTTCAAGGATAACAATGC-3'     |        |                                             |
| P607: <i>mcp5+</i> fwd   | 5'-AGACGTATTCACCTTACCTC-3'     |        | 1c, 1j, 3c, 4e, S1a, S1c, S3b, S3c          |
| P608: <i>mcp5+</i> rev   | 5'-GTTTCCCATCATGACATGTT-3'     |        |                                             |
| P881: <i>mei2+</i> rev   | 5'-GGGATTCTGAGAGAACAGAA-3'     |        | S1a, S11, S3b                               |
| P1010: <i>mei2+</i> fwd  | 5'-GAGTTGGTGAACGGAAAGTA-3'     |        |                                             |
| P1194: <i>omt3</i> rev   | 5'-GTCACGTACATCAAACATCAT-3'    |        | 2f, 2g                                      |
| P1207: <i>omt3</i> fwd   | 5'-AGGTCTTATAAGAAACATATGTGT-3' |        |                                             |
| P1208: <i>mamRNA</i> fwd | 5'-TGGGATTAAGTCATCTTGGTG-3'    |        | 2f, 2g, S2j                                 |
| P1209: <i>mamRNA</i> rev | 5'-GTCAAAAAGATACCACAGCA-3'     |        |                                             |
| P1284: <i>snoU14</i> rev | 5'-CATCCAAAGGAAGGACTATG-3'     |        | S2j                                         |
| P1392: <i>snoU14</i> fwd | 5'-CAGGTGATGAAATTTCCATTG-3'    |        |                                             |
| P1470: <i>sno16</i> fwd  | 5'-AGGAGTAAATTAAACTGCCTC-3'    |        |                                             |
| P1471: <i>sno16</i> rev  | 5'-CAAGGAAATTACAGCTGCTT-3'     |        |                                             |
| P1472: <i>snR3</i> fwd   | 5'-GCATTTCGTATTTGCTATTCAC-3'   |        |                                             |
| P1473: <i>snR3</i> rev   | 5'-TATGTGGACCTTCTGACACT-3'     |        |                                             |
| P1474: <i>snR10</i> fwd  | 5'-GAAAACCATCTCACCCAATC-3'     |        |                                             |
| P1475: <i>snR10</i> rev  | 5'-GGATTCAAACTTGATGCAGT-3'     |        |                                             |
| P1476: <i>snR30</i> fwd  | 5'-GTGTAGAGGTTGACAAGAGT-3'     |        |                                             |
| P1477: <i>snR30</i> rev  | 5'-TACGCAGCATCCTTTAGTC-3'      |        |                                             |

|                                                    |                                                         |                                          |                                         |     |
|----------------------------------------------------|---------------------------------------------------------|------------------------------------------|-----------------------------------------|-----|
| P1324: <i>mamRNA</i> rev                           | 5'-CCATACACGACAGACATACTGTACAA TC-3'                     | RNaseH cleavage                          | S2e                                     |     |
| P1450: <i>snoU14</i> rev                           | 5'-AACATCAGACATCCAAAGGAAGG-3'                           |                                          |                                         |     |
| P1420: <i>mamRNA</i> fwd                           | 5'-CTGGGATTAAGTCATCTTGGTGCAG-3'                         | Northern probes (T7 promoter)            | 2b, S2e                                 |     |
| P1421: <i>mamRNA</i> rev                           | 5'-TAATACGACTCACTATAGGGGAA CAGCTTCGTTGTA CT CAGACATC-3' |                                          |                                         |     |
| P234: <i>adh1+</i> fwd                             | 5'-AACGTCAAGTTCGAGGAAGTCC-3'                            |                                          | 2b                                      |     |
| P1460: <i>adh1+</i> rev                            | 5'-TAATACGACTCACTATAGGGGT CTCCTCAGCCTTCATACAGTACTC-3'   |                                          |                                         |     |
| P1424: <i>U3B</i> fwd                              | 5'-GTCCGGCTTGGGTTTCCTAAC-3'                             |                                          |                                         |     |
| P1425: <i>U3B</i> rev                              | 5'-TAATACGACTCACTATAGGG CGTCAGAAAACACCAGCTGC-3'         |                                          |                                         |     |
| P1448: <i>snoU14</i> fwd                           | 5'-ATCAACAGGTGATGAAATTTCCAT TG-3'                       |                                          | S2e                                     |     |
| P1450: <i>snoU14</i> rev                           | 5'-TAATACGACTCACTATAGGGAA CATCAGACATCCAAAGGAAGG-3'      |                                          |                                         |     |
| P1511: between <i>mamRNA</i> and <i>snoU14</i> fwd | 5'-CTTGCTATGCTTAAACTCGC-3'                              |                                          |                                         |     |
| P1512: between <i>mamRNA</i> and <i>snoU14</i> rev | 5'-TAATACGACTCACTATAGGG AATCTCCACCATAACTCGTAC-3'        |                                          |                                         |     |
| P1323: <i>mamRNA</i> rev                           | 5'-TACAAGGGATCCCTGCACC AAGATGACTTAATCCCAG-3'            |                                          | 5' RACE (extension, BamHI site)         | S2d |
| P1324: <i>mamRNA</i> rev-nested                    | 5'-TACAAGGGATCCCATACAC GACAGACATACTGTACAATC-3'          |                                          |                                         |     |
| P1492: <i>snoU14</i> rev                           | 5'-TACAAGGGATCCAACATC AGACATCCAAAGGAAGG-3'              |                                          |                                         |     |
| P1493: <i>snoU14</i> rev-nested                    | 5'-TACAAGGGATCCAATTGGGTTTCG TATGCCGC-3'                 |                                          |                                         |     |
| P1325: <i>mamRNA</i> fwd                           | 5'-TACAAGGGATCCGGATGG TTCTCCTTCAGGCTCTTGG-3'            | 3' RACE (extension, BamHI site)          |                                         |     |
| P1491: <i>snoU14</i> fwd                           | 5'-TACAAGGGATCCATCAAC AGGTGATGAAATTTCCATTG-3'           |                                          |                                         |     |
| oMG432: Mei2-[579-750] WT                          | 5'-CCTGCCCCGGGTTTCAGAT AGAAATTCTGTCGATTATGC-3'          | Cloning for expression in <i>E. coli</i> | 1e, 1f, S1e, S1f, S1g, Tables S1 and S2 |     |
| oMG429: Mei2-[579-750] WT                          | 5'-GCCGGCGGCCGCTCAACATTTG CTTGCAGTTGG-3'                |                                          |                                         |     |
| oMG486: Mei2-[579-750] F644A                       | 5'-GTAGGATATGCGGCTATAAAC TTTATTGAACCTCAATCTA-3'         |                                          |                                         |     |
| oMG487: Mei2-[579-750] F644A                       | 5'-AAGTTTATAGCCGCATATCCTAC ATTGCATTTATTAACAA-3'         |                                          |                                         |     |



**Supplementary Table 6: smFISH probes used in this study**

| Target RNA | Probe | Sequence                   |
|------------|-------|----------------------------|
| meiRNA     | #1    | 5'-ATACCCACTAAGTCTGTTTA-3' |
|            | #2    | 5'-CGGCAGAAGATTGACCAACA-3' |
|            | #3    | 5'-GCATATTCCGTCTTACAATA-3' |
|            | #4    | 5'-ACCAACTAAAGCGATCTTGC-3' |
|            | #5    | 5'-GACCATTTCAAAATGTTGCA-3' |
|            | #6    | 5'-TACCGAATCCAGCTTTTTGA-3' |
|            | #7    | 5'-CAGAGCTTAGAAGACAAGGT-3' |
|            | #8    | 5'-TAACTGGACCCCATCAAGAA-3' |
|            | #9    | 5'-TAAACCAACTTGGGGTTGG-3'  |
|            | #10   | 5'-TCTAAGCTACTATTCATCCA-3' |
|            | #11   | 5'-AGTAGATTCCATCAGTCATA-3' |
|            | #12   | 5'-TGCAGCCAAAAAGTGTACCA-3' |
|            | #13   | 5'-CATTGTAAGTGCTTCAAGG-3'  |
|            | #14   | 5'-TTCAGTCATTCGCAAAGTTT-3' |
|            | #15   | 5'-AGTCGTTTTATTTCTTTTCT-3' |
|            | #16   | 5'-GTTTCAACAATAGTTCAGGT-3' |
|            | #17   | 5'-TCTGTTTCAGGAATACGTTT-3' |
|            | #18   | 5'-TGTTTCGCATCAAACCTTCA-3' |
|            | #19   | 5'-GCGTTTAAACAACTGCGGG-3'  |
|            | #20   | 5'-TGGTTTCAGCACGTTTTCAA-3' |
|            | #21   | 5'-TTGGTTTGCAGGGTTAACG-3'  |
|            | #22   | 5'-CTTGCTGTGGTTATTGTTTA-3' |
| mamRNA     | #1    | 5'-CCTTCAGACTCATGGAAGTA-3' |
|            | #2    | 5'-TGGCGTCCTAGCATATTAAT-3' |
|            | #3    | 5'-TAAACCTCTTGTCTCCACTA-3' |
|            | #4    | 5'-GCCTTTCAACATCAGATAAT-3' |
|            | #5    | 5'-GCCATTTACGATAAGAACCT-3' |
|            | #6    | 5'-AAGAGCCTGAAGGAGAACCA-3' |
|            | #7    | 5'-ACACAGATACAGGCGAACGC-3' |
|            | #8    | 5'-ATCAGACTAGAATCTCTCCA-3' |
|            | #9    | 5'-GCAACCATACACGACAGACA-3' |
|            | #10   | 5'-ACCAAGATGACTTAATCCCA-3' |
|            | #11   | 5'-CCAACACAGTACCAATTACT-3' |
|            | #12   | 5'-AGGAATATGGTAGGTTTTTC-3' |
|            | #13   | 5'-AAAGATACCACAGCAAGCGC-3' |
|            | #14   | 5'-ACTAAGCTTTAACACCCAGT-3' |
|            | #15   | 5'-AGTATGCGTACGGGATTTAC-3' |
|            | #16   | 5'-TTCAGTTTGAGTTCAAGGTT-3' |
|            | #17   | 5'-CGGCGAACATACCTTTACAA-3' |
|            | #18   | 5'-TACTCAGACATCAATCAGCA-3' |
|            | #19   | 5'-TATCATCAGAACAGCTTCGT-3' |
|            | #20   | 5'-CATAGTCGATAGGACGGGTA-3' |
|            | #21   | 5'-TCCACCTATAGTGGAGACAA-3' |
|            | #22   | 5'-AGACATCGAAGATACTGGCA-3' |

|                   |     |                            |
|-------------------|-----|----------------------------|
| <i>mcp5+</i> mRNA | #1  | 5'-CACCTCGTTATCTTGTTTTT-3' |
|                   | #2  | 5'-CTAACGCTTTCGCATAAGCA-3' |
|                   | #3  | 5'-CTTTTGAACCACTTGGTCTT-3' |
|                   | #4  | 5'-ATTTTTTTCCAAGTCGCGTA-3' |
|                   | #5  | 5'-AAGCATCTCCGTAATTCTCA-3' |
|                   | #6  | 5'-ATTTGTGTTCTTCCTTCTTT-3' |
|                   | #7  | 5'-TGTTGCAGAAGGTTTAAGCC-3' |
|                   | #8  | 5'-AATGGGCATTATCCACTGAC-3' |
|                   | #9  | 5'-CCTTAGTCTTCTCTTTCATA-3' |
|                   | #10 | 5'-AGTTTGTCTTCTCATCGTT-3'  |
|                   | #11 | 5'-GCTCGTGAAGGCAAATTCTT-3' |
|                   | #12 | 5'-CATCTATAGTTTCGCCTTTT-3' |
|                   | #13 | 5'-TTTTCATCCTCAGTTACCAA-3' |
|                   | #14 | 5'-TTATCCGAGGAAGACTCCAA-3' |
|                   | #15 | 5'-CTTGCTCCGCATCAAAGAT-3'  |
|                   | #16 | 5'-TGATGGATTTGAGAACGGCC-3' |
|                   | #17 | 5'-CACTCACTAACTCCTGTTTT-3' |
|                   | #18 | 5'-TTTTAGTATCGTCAGCTACC-3' |
|                   | #19 | 5'-TGTCAGCTTTTGTGTTTTCA-3' |
|                   | #20 | 5'-GAGTTTTCTGGTGATACTGC-3' |
|                   | #21 | 5'-GGTTTCATCTTCGATGTCTA-3' |
|                   | #22 | 5'-AGCTGAAAAAGGCCCAAGTT-3' |
|                   | #23 | 5'-TGAGCTTTTAGTCGGTTTGA-3' |
|                   | #24 | 5'-TGGCGAGGTTCAAATTGAGC-3' |
|                   | #25 | 5'-CAGTACTTGCAGACATGTCG-3' |
|                   | #26 | 5'-ACGTCCACCTTTGTTTAATG-3' |
|                   | #27 | 5'-TGGAGATTGTATTTGCACCA-3' |
|                   | #28 | 5'-ATTCTTTTGCAGATTCCACT-3' |
|                   | #29 | 5'-ACATTTGAAAGCGCATCGGT-3' |
|                   | #30 | 5'-TTTTCTTTTCAACCTCGTGG-3' |
|                   | #31 | 5'-GGATTACTATAGTGGCGCAA-3' |
|                   | #32 | 5'-GCTCTTGATATGGGATCTTT-3' |
|                   | #33 | 5'-GTTCCGTTTGAATGTCTTGA-3' |
|                   | #34 | 5'-CGAGTATTCTTAGGTGCAGA-3' |
|                   | #35 | 5'-AGGAATCATGCCGAGTTTTT-3' |
|                   | #36 | 5'-TTGCTTTCAATTGACGTGCT-3' |
|                   | #37 | 5'-ATAGAAATCGTCGTAGCCGT-3' |
|                   | #38 | 5'-AGGTGAATACGTCTGACACC-3' |
|                   | #39 | 5'-TGAAACTCTCACTTCTCGGG-3' |
|                   | #40 | 5'-GCGCCAATGACTCTTTTTAA-3' |
|                   | #41 | 5'-TTCACAATGCGGGTTAATCC-3' |
|                   | #42 | 5'-GGATTTGTTTTAGACCAGCA-3' |
|                   | #43 | 5'-CTTGATTTTTCTTCCTTTT-3'  |
|                   | #44 | 5'-GCATCTGGGGCTTTTATAAT-3' |
|                   | #45 | 5'-TATCAGTTGTCTGCATCACA-3' |
|                   | #46 | 5'-TTTTCTTGCTTTTCGCTTTT-3' |
|                   | #47 | 5'-AGCTTGAACCCAGATATTGT-3' |
|                   | #48 | 5'-TAAATGCCGGGCTTAGTATC-3' |

|                   |     |                             |
|-------------------|-----|-----------------------------|
| <i>mei4+</i> mRNA | #1  | 5'-TTCGACATTCCTTGATTTT-3'   |
|                   | #2  | 5'-AGTATGACCTTTTTGGGTTT-3'  |
|                   | #3  | 5'-CTTCAGTTTCGCATTTTTCT-3'  |
|                   | #4  | 5'-GGTTTTCTTTATTCTCTTCA-3'  |
|                   | #5  | 5'-TGTCGTATACTGTCACTACT-3'  |
|                   | #6  | 5'-GCCATTTTCATCTCCAAATAT-3' |
|                   | #7  | 5'-TTCACCAGTATCCACAAAGC-3'  |
|                   | #8  | 5'-TAGCATAAGAACACGGTGGT-3'  |
|                   | #9  | 5'-TAGGATCGCCAAACCGATTA-3'  |
|                   | #10 | 5'-GTCAGTTGCTTGTTATGTGA-3'  |
|                   | #11 | 5'-AATCCACGTATAAATCCCGC-3'  |
|                   | #12 | 5'-ATCATGGTTGAGGTAGTAGC-3'  |
|                   | #13 | 5'-GTTGTGCCTAATGCTATTTT-3'  |
|                   | #14 | 5'-AAAGTTTTACCCTTGGGTTT-3'  |
|                   | #15 | 5'-AAGTTCTGCATATGGTCAGG-3'  |
|                   | #16 | 5'-GAACGATGTAAGCGAACGCT-3'  |
|                   | #17 | 5'-ACTGTTTGAGTCAGTTGAGT-3'  |
|                   | #18 | 5'-ATTTGCTTGAAGGTCGCTTT-3'  |
|                   | #19 | 5'-TCGTCAACGGTTTGATTTCA-3'  |
|                   | #20 | 5'-CGAGCTAATGGTATCTCTCG-3'  |
|                   | #21 | 5'-AGAGTTTAATCGACTTCGCT-3'  |
|                   | #22 | 5'-CGAGCCAGAAGTTGATGTTG-3'  |
|                   | #23 | 5'-CTTCGGCAGCAACATTTGAA-3'  |
|                   | #24 | 5'-TTGATGGTTGACTTGCATCG-3'  |
|                   | #25 | 5'-ATTAGAAGGGGGAAGAGGGG-3'  |
|                   | #26 | 5'-GGTTTAGGTACATTTTCTGA-3'  |
|                   | #27 | 5'-GATCTTCTTGAGTTTCAGCA-3'  |
|                   | #28 | 5'-TAAAGGCTAGACTCATGGGC-3'  |
|                   | #29 | 5'-GACGAGAATCGTTGACGTTT-3'  |
|                   | #30 | 5'-CCCAGTATTTAATGCCATAT-3'  |
|                   | #31 | 5'-TAACCAGGATCTGCATCAGA-3'  |
|                   | #32 | 5'-CTGTTATGGCTATTAGAGCG-3'  |
|                   | #33 | 5'-CTTCATTGGCAGAATACGGA-3'  |
|                   | #34 | 5'-AATCTGCCTGTAGAACATCC-3'  |
|                   | #35 | 5'-GCATGGAATGAGGATCTCGA-3'  |
|                   | #36 | 5'-ATGGGTTCCCTACGATAATA-3'  |
|                   | #37 | 5'-AACGGGATGATGGACGTAGT-3'  |
|                   | #38 | 5'-GTTGGGCGTGTATATTCATA-3'  |
|                   | #39 | 5'-AAGAGGTATCTGTACGACCG-3'  |
|                   | #40 | 5'-GTTGAACAAAAGCGCCGGG-3'   |
|                   | #41 | 5'-GGACTTGAAGGTGCACATTT-3'  |
|                   | #42 | 5'-CATGTTTCGGATGTTTTTGT-3'  |
|                   | #43 | 5'-ATCCATCGAAAGAGGGTGT-3'   |
|                   | #44 | 5'-TGACTTGAAGGATCCACGG-3'   |
|                   | #45 | 5'-CAAACAAAGGCTCCGAGAGC-3'  |
|                   | #46 | 5'-GTCCCTAAAACATGTTACCG-3'  |
|                   | #47 | 5'-TAGCCACTTGACTCATGATT-3'  |
|                   | #48 | 5'-ACGCTCGATTAGAAGGCATT-3'  |
