# Supplementary material for: A scaffold lncRNA shapes the mitosis to meiosis switch
Source: PubMed Central journal article supplement (PMC7859202; doi:10.1038/s41467-021-21032-7), 2021-02-03
Supplement: 41467_2021_21032_MOESM2_ESM.pdf [file 41467_2021_21032_MOESM2_ESM.pdf]

## **Description of Additional Supplementary Files**

### **Supplementary Data 1 (related to Fig. 2): Analysis of sequential RIP-sequencing (seqRIP-seq) data.**

Shown are the features reproducibly enriched upon sequential immunoprecipitations of Mmi1 and Mei2 from biological duplicates.

### **Supplementary Data 2 (related to Fig. 3): Analysis of RNA-sequencing data.**

Shown are the up-regulated and down-regulated genes in *mot2Δ*, *mamRNAΔ* and *mot2Δ mamRNAΔ* cells relative to the *wt* strain, and the associated *p*-values.
